# Supplementary material
Source: ML conference proceedings conference paper supplement (https://openreview.net/forum?id=WXAjAelIpJ)
Supplement: supplementary_material [file 7264_TechnicalAppendix.pdf › 7264_TechnicalAppendix.pdf]

## A Missing Proofs

### A.1 Proof of Theorem 3.8

*Proof.* Let us first show that the Hamming distance indeed satisfies the respective axioms, by considering them one by one.

*Anonymity*

Clearly, for every  $x, y \in \{0, 1\}^n$  and permutation  $\pi : [n] \rightarrow [n]$  it holds that  $|A_x \triangle A_y| = |A_{\pi(x)} \triangle A_{\pi(y)}|$ . Thus,

$$H(\pi(x), \pi(y)) = H(x, y).$$

*Scaling*

Observe that for every  $x, y \in \{0, 1\}^n$  and  $k \in \mathbb{N}$  it holds that

$$H(x^k, y^k) = \frac{k \cdot |A_x \triangle A_y|}{k \cdot n} = \frac{|A_x \triangle A_y|}{n} = H(x, y).$$

*Independent Symmetry*

For every  $x, y \in \{0, 1\}^n$  and  $i \in [n]$  it holds that  $|A_x \triangle A_y| = |A_{(x_{-i}, y_i)} \triangle A_{(y_{-i}, x_i)}|$ . Thus,

$$H((x_{-i}, y_i), (y_{-i}, x_i)) = H(x, y).$$

*Zero-One Symmetry*

Note that for every  $x, y \in \{0, 1\}^n$  it holds that  $|A_x \triangle A_y| = |A_x \setminus A_y| + |A_y \setminus A_x| = |A_{\bar{y}} \setminus A_{\bar{x}}| + |A_{\bar{x}} \setminus A_{\bar{y}}| = |A_{\bar{x}} \triangle A_{\bar{y}}|$ . Hence,

$$H(\bar{x}, \bar{y}) = H(x, y).$$

*Convergence*

Fix arbitrary  $x, y \in \{0, 1\}^n$ . Observe that after concatenating an additional bit to  $x$  and  $y$  with 1s on both sides, the symmetric difference will not change, i.e.,  $|A_x \triangle A_y| = |A_{x \circ (1)} \triangle A_{y \circ (1)}|$ . Thus, we have

$$H(x \circ (1), y \circ (1)) = \frac{|A_x \triangle A_y|}{n+1} = \frac{n}{n+1} H(x, y),$$

which implies the weak inequality.

*Triangle Inequality*<sup>1</sup>

Take arbitrary  $x, y, z \in \{0, 1\}^n$ . Also, consider arbitrary index  $i \in [n]$  such that  $i \in A_x \setminus A_z$ . If  $i \in A_y$  as well, then it implies that  $i \in A_y \setminus A_z$ . Conversely, if  $i \notin A_y$ , then  $i \in A_x \setminus A_y$ . Thus,  $A_x \setminus A_z \subseteq (A_x \setminus A_y) \cup (A_y \setminus A_z)$ , which means that  $|A_x \setminus A_z| \leq |A_x \setminus A_y| + |A_y \setminus A_z|$  since  $A_x \setminus A_y$  and  $A_y \setminus A_z$  are disjoint (as one is a subset of  $A_y$  and the other of  $A_{\bar{y}}$ ). Analogously, we get that  $|A_z \setminus A_x| \leq |A_z \setminus A_y| + |A_y \setminus A_x|$ . Adding the inequalities sidewise together and dividing by  $n$  we obtain

$$H(x, z) = \frac{|A_x \triangle A_z|}{n} \leq \frac{|A_x \triangle A_y| + |A_y \triangle A_z|}{n} = H(x, y) + H(y, z).$$

*Normalization*

Clearly,  $H((0), (1)) = 1$ .

In the remainder of the proof, let us focus on the converse statement, i.e., that any dissimilarity measure that satisfies these axioms must necessarily be the Hamming distance. We will prove that in a series of lemmas that will consider arbitrary dissimilarity measure  $f$  satisfying increasing subset of our axioms. In each lemma, we will prove what form has to have such a function  $f$ . In the last one, Lemma A.10, we show that if  $f$  satisfies all of our axioms except for Normalization, then  $f$  has to be equal to the Hamming distance multiplied by a nonnegative scalar, i.e., there exists  $a \in \mathbb{R}_{\geq 0}$  such that  $f(x, y) = a \cdot H(x, y)$ , for every  $x, y \in \{0, 1\}$ . Then, Normalization implies the thesis.

<sup>1</sup>It is a widely known fact that the Hamming distance is a proper distance metric, thus it satisfies Triangle Inequality. We provide a proof for completeness.

738 **Lemma A.1.** *If a dissimilarity measure,  $f$ , satisfies Anonymity, then there exists a function,  $g : \mathbb{N}^4 \rightarrow$   
739  $\mathbb{R}_{\geq 0}$ , such that for every  $x, y \in \{0, 1\}^n$  it holds that*

$$f(x, y) = g(|A_x \cap A_y|, |A_x \setminus A_y|, |A_y \setminus A_x|, n - |A_x \cup A_y|).$$

740 *Proof.* Assume otherwise, i.e., there exist four vectors  $x, x', y, y' \in \{0, 1\}^n$  such that  $|A_x \cap A_y| =$   
741  $|A_{x'} \cap A_{y'}|$ ,  $|A_x \setminus A_y| = |A_{x'} \setminus A_{y'}|$ ,  $|A_y \setminus A_x| = |A_{y'} \setminus A_{x'}|$ , and  $n - |A_x \cup A_y| = n - |A_{x'} \cup A_{y'}|$   
742 and  $f(x, y) \neq f(x', y')$ .

743 Observe that because of the equal sizes of the corresponding sets, we can find following bijections:

$$\begin{aligned} \pi_1 : A_x \cap A_y &\rightarrow A_{x'} \cap A_{y'}, \\ \pi_2 : A_x \setminus A_y &\rightarrow A_{x'} \setminus A_{y'}, \\ \pi_3 : A_y \setminus A_x &\rightarrow A_{y'} \setminus A_{x'}, \text{ and} \\ \pi_4 : [n] \setminus (A_x \cup A_y) &\rightarrow [n] \setminus (A_{x'} \cup A_{y'}). \end{aligned}$$

744 Since their domains are disjoint and sum up to the whole set  $[n]$  and the same is true for their  
745 codomains, we can take a disjoint union of these bijections  $\pi = \pi_1 \cup \pi_2 \cup \pi_3 \cup \pi_4 : [n] \rightarrow [n]$ . Then  
746 observe that  $\pi(x) = x'$  and  $\pi(y) = y'$ . Thus, by Anonymity  $f(x, y) = f(\pi(x), \pi(y)) = f(x', y')$ ,  
747 which is a contradiction.  $\square$

748 **Lemma A.2.** *If a dissimilarity measure,  $f$ , satisfies Anonymity, and Independent Symmetry, then  
749 there exists a function,  $g : \mathbb{N}^3 \rightarrow \mathbb{R}_{\geq 0}$ , such that for every  $x, y \in \{0, 1\}^n$  it holds that*

$$f(x, y) = g(|A_x \cap A_y|, |A_x \triangle A_y|, n - |A_x \cup A_y|).$$

750 *Proof.* Since  $f$  satisfies Anonymity, from Lemma A.1 we know that there exists a function,  $g : \mathbb{N}^4 \rightarrow$   
751  $\mathbb{R}_{\geq 0}$ , such that for every  $x, y \in \{0, 1\}^n$  it holds that

$$f(x, y) = g(|A_x \cap A_y|, |A_x \setminus A_y|, |A_y \setminus A_x|, n - |A_x \cup A_y|).$$

752 It remains to show that for arbitrary  $x, y \in \{0, 1\}^n$ , it holds that

$$g(|A_x \cap A_y|, |A_x \setminus A_y|, |A_y \setminus A_x|, n - |A_x \cup A_y|) = g(|A_x \cap A_y|, |A_x \triangle A_y|, 0, n - |A_x \cup A_y|). \quad (1)$$

753 To this end, take  $x', y' \in \{0, 1\}^n$  such that  $x'_i = 1$  and  $y'_i = 0$ , for every  $i \in A_y \triangle A_x$ , and  
754  $x'_i = x_i$  and  $y'_i = y_i$ , otherwise. Then, by Independent Symmetry used  $|A_y \setminus A_x|$  times, we  
755 obtain that  $f(x, y) = f(x', y')$ . Since  $|A_{x'} \setminus A_{y'}| = |A_x \triangle A_y|$  and  $|A_{y'} \setminus A_{x'}| = 0$  this proves  
756 Equation (1).  $\square$

757 **Lemma A.3.** *If a dissimilarity measure,  $f$ , satisfies Anonymity, Independent Symmetry, and Scaling,  
758 then there exists a function,  $g : (\mathbb{Q} \cap [0, 1]) \rightarrow \mathbb{R}_{\geq 0}$ , such that for every  $x, y \in \{0, 1\}^n$  with  
759  $|A_x \cup A_y| = n$  it holds that*

$$f(x, y) = g(|A_x \triangle A_y|/n).$$

760 *Proof.* Assume otherwise, i.e., there exist four vectors  $x, y \in \{0, 1\}^n$  and  $a, b \in \{0, 1\}^m$  such that  
761  $|A_x \cup A_y| = n$ ,  $|A_a \cup A_b| = m$  and  $|A_x \triangle A_y|/n = |A_a \triangle A_b|/m$ , but  $f(x, y) \neq f(a, b)$ . Let  $k$  be  
762 the least common multiple of  $n$  and  $m$  and let  $p = k/n$  and  $q = k/m$ . By Scaling, we know that  
763  $f(x, y) = f(x^p, y^p)$  and  $f(a, b) = f(a^q, b^q)$ . Thus, to get the contradiction, it remains to show that  
764  $f(x^p, y^p) = f(a^q, b^q)$ .

765 Since  $f$  satisfies Anonymity and Independent Symmetry, from Lemma A.1 we know that there exists  
766 a function,  $g' : \mathbb{N}^3 \rightarrow \mathbb{R}_{\geq 0}$ , such that

$$f(x^p, y^p) = g'(|A_{x^p} \cap A_{y^p}|, |A_{x^p} \triangle A_{y^p}|, n - |A_{x^p} \cup A_{y^p}|).$$

767 Observe that the assumption that  $|A_x \cup A_y| = n$  implies also that  $|A_{x^p} \cup A_{y^p}| = k$  (if there is no  
768 index  $i \in [n]$  such that  $x_i = y_i = 0$ , then there is no such index for  $x^p$  and  $y^p$  as well). Thus, we get

$$f(x^p, y^p) = g'(|A_{x^p} \cap A_{y^p}|, |A_{x^p} \triangle A_{y^p}|, 0).$$

769 Analogously, we get that

$$f(a^q, b^q) = g'(|A_{a^q} \cap A_{b^q}|, |A_{a^q} \triangle A_{b^q}|, 0).$$

770 Now, observe that

$$\frac{|A_{x^p} \triangle A_{y^p}|}{k} = \frac{p|A_x \triangle A_y|}{p \cdot n} = \frac{|A_x \triangle A_y|}{n} = \frac{|A_a \triangle A_b|}{m} = \frac{q|A_a \triangle A_b|}{q \cdot m} = \frac{|A_{a^q} \triangle A_{b^q}|}{k}.$$

771 Let us denote this ratio by  $r$ . Then, we get

$$f(x^p, y^p) = g'(k - r \cdot k, r \cdot k, 0) = f(a^q, b^q),$$

772 which concludes the proof.  $\square$

773 **Lemma A.4.** *If a dissimilarity measure,  $f$ , satisfies Anonymity, Independent Symmetry, Scaling, and*  
 774 *Triangle Inequality, then there exists a subadditive function,  $g : (\mathbb{Q} \cap [0, 1]) \rightarrow \mathbb{R}_{\geq 0}$ , such that for*  
 775 *every  $x, y \in \{0, 1\}^n$  with  $|A_x \cup A_y| = n$  it holds that*

$$f(x, y) = g(|A_x \triangle A_y|/n).$$

776 *Proof.* From Lemma A.3 we know that there exists a function,  $g : (\mathbb{Q} \cap [0, 1]) \rightarrow \mathbb{R}_{\geq 0}$ , such that  
 777 for every  $x, y \in \{0, 1\}^n$  with  $|A_x \cup A_y| = n$  it holds that  $f(x, y) = g(|A_x \triangle A_y|/n)$ . It remains to  
 778 show that  $g$  is subadditive, i.e., for arbitrary  $p, q \in (\mathbb{Q} \cap [0, 1])$  such that  $p + q \leq 1$ , it holds that  
 779  $g(p) + g(q) \geq g(p + q)$ . To this end, let  $r = 1 - p - q$  and let  $k$  be such that  $pk, qk, rk \in \mathbb{N}$ . Then,  
 780 consider the following three vectors

$$\begin{aligned} x &= (0)^{pk} \circ (1)^{rk} \circ (1)^{qk}, \\ y &= (1)^{pk} \circ (1)^{rk} \circ (1)^{qk}, \text{ and} \\ z &= (1)^{pk} \circ (1)^{rk} \circ (0)^{qk}. \end{aligned}$$

781 Then, from Triangle Inequality we get  $f(x, y) + f(y, z) \geq f(x, z)$ , which in terms of  $g$  means  
 782  $g(\frac{kp}{k(p+q+r)}) + g(\frac{kq}{k(p+q+r)}) \geq g(\frac{k(p+q)}{k(p+q+r)})$ . Since  $p + q + r = 1$ , we get that indeed  $g(p) + g(q) \geq$   
 783  $g(p + q)$ , which concludes the proof.  $\square$

784 **Lemma A.5.** *If a dissimilarity measure,  $f$ , satisfies Anonymity, Independent Symmetry, Scaling,*  
 785 *Convergence, and Triangle Inequality then there exists constant  $a \in \mathbb{R}_{\geq 0}$  such that for every*  
 786  *$x, y \in \{0, 1\}^n$  with  $|A_x \cup A_y| = n$  it holds that*

$$f(x, y) = a \cdot H(x, y).$$

787 *Proof.* From Lemma A.9 we know that there exists a subadditive function,  $g : (\mathbb{Q} \cap [0, 1]) \rightarrow \mathbb{R}_{\geq 0}$ ,  
 788 such that for every  $x, y \in \{0, 1\}^n$  it holds that  $f(x, y) = g(|A_x \triangle A_y|/n) = g(H(x, y))$ . Let  
 789  $a = g(1)$ . We will show that for every  $r \in \mathbb{Q} \cap [0, 1]$  it holds that  $g(r) = ar$ , which will imply the  
 790 thesis.

791 We begin by showing that for every  $r \in \mathbb{Q} \cap [0, 1]$  it holds that

$$g(r/2) = g(r)/2. \quad (2)$$

792 Let  $p, q \in \mathbb{N}$  be such that  $r = p/q$ . Then, by Convergence used  $n$  times we get that

$$\begin{aligned} g(p/q) &= f((1)^q, (0)^p \circ (1)^{q-p}) \\ &\geq 2 \cdot f((1)^q \circ (1)^q, (0)^p \circ (1)^{q-p} \circ (1)^q) \\ &= 2 \cdot g(p/(2q)). \end{aligned}$$

793 Hence,  $g(r) \geq 2 \cdot g(r/2)$ . On the other hand,  $g(r) \leq 2 \cdot g(r/2)$  from subadditivity. Thus, indeed  
 794 Equation (2) holds.

795 Next, we generalize Equation (2) and prove that for every  $r \in \mathbb{Q} \cap [0, 1]$  and  $q \in \mathbb{N}$  it holds that

$$g(r/q) = g(r)/q. \quad (3)$$

796 Observe that it is enough to prove this equality for prime  $q$ , as for composite  $qs$  we can obtain  
 797 the thesis by combining the results for all prime factors of  $q$ . Thus, without loss of generality,  
 798 let us assume that  $q$  is prime. Clearly, from subadditivity, we have that  $g(r/q) \geq g(r)/q$ . For a  
 799 contradiction assume that  $g(r/q) = g(r)/q + \varepsilon$  for some  $\varepsilon > 0$ . By Little Fermat's Theorem, we

800 know that there exists  $p \in \mathbb{N}$  such that  $p \cdot q = 2^{q-1} - 1$ . Then, we have that  $1 + p \cdot q = 2^{(q-1)}$ , which  
 801 means that  $1 = (1 + p \cdot q)/2^{(q-1)}$ . In turn, this implies that

$$\frac{1}{q} = \frac{1 + p \cdot q}{2^{q-1}q} = \frac{1}{2^{q-1}q} + \frac{p}{2^{q-1}}. \quad (4)$$

802 Thus, we get

$$\begin{aligned} g\left(\frac{r}{q}\right) &= g\left(\frac{r}{2^{k(q-1)}q} + \frac{r \cdot p}{2^{k(q-1)}}\right) && \text{(from Equation (4))} \\ &\leq g\left(\frac{r}{2^{q-1}q}\right) + p \cdot g\left(\frac{r}{2^{q-1}}\right) && \text{(from subadditivity)} \\ &= \frac{1}{2^{q-1}}g\left(\frac{r}{q}\right) + \frac{p}{2^{q-1}}g(r). && \text{(from Equation (2) used } q-1 \text{ times)} \end{aligned}$$

803 Substituting  $g(r/q) = g(r)/q + \varepsilon$ , we get

$$\begin{aligned} g(r)/q + \varepsilon &\leq \frac{g(r)/q + \varepsilon}{2^{q-1}} + \frac{p}{2^{q-1}}g(r) \\ &= g(r) \frac{1 + p \cdot q}{2^{q-1}q} + \varepsilon/2^{q-1} \\ &= g(r)/q + \varepsilon/2^{q-1}. && \text{(from Equation (4))} \end{aligned}$$

804 Thus,  $\varepsilon \leq \varepsilon/2^{q-1}$ , which is a contradiction for  $\varepsilon > 0$ . Therefore, Equation (3) indeed holds, from  
 805 which we immediately obtain that

$$\begin{aligned} g(0) &= 0, \text{ and} \\ g(1/q) &= a/q, \text{ for every } q \in \mathbb{N}. \end{aligned} \quad (5)$$

806 Finally, let us take  $r = p/q$  for arbitrary  $p, q \in \mathbb{N}$  such that  $1 \leq p \leq q$ . From subadditivity and  
 807 Equation (5) we get that  $g(p/q) \leq p \cdot g(1/q) = ap/q$ . On the other hand, again from subadditivity  
 808 and Equation (5), we get that  $g(p/q) \geq g(1) - (q-p)g(1/q) = a - a(q-p)/q = a \cdot p/q$ . Thus,  
 809 indeed  $g(r) = ar$ , for every  $r \in \mathbb{Q} \cap [0, 1]$ , which concludes the proof.  $\square$

810 **Lemma A.6.** *If a dissimilarity measure,  $f$ , satisfies Anonymity, Independent Symmetry, Zero-One*  
 811 *Symmetry, Scaling, Convergence, and Triangle Inequality then there exists constant  $a \in \mathbb{R}_{\geq 0}$  such*  
 812 *that for every  $x, y \in \{0, 1\}^n$  it holds that*

$$f(x, y) = a \cdot H(x, y).$$

813 *Proof.* We will prove the thesis by induction on  $n - |A_x \cup A_y|$ . Let  $a$  be a constant from Lemma A.5.  
 814 For the basis of induction, we know that for every  $x, y \in \{0, 1\}^n$  such that  $n - |A_x \cup A_y| = 0$ , i.e.,  
 815  $|A_x \cup A_y| = n$  by Lemma A.5 it holds that

$$f(x, y) = a \cdot H(x, y).$$

816 Now, assume that the thesis holds for all  $n \in \mathbb{N}$  and  $x, y \in \{0, 1\}^n$  such that  $n - |A_x \cup A_y| = N$  and  
 817 fix arbitrary  $x, y \in \{0, 1\}^n$  with  $n - |A_x \cup A_y| = N + 1$ . By Anonymity, without loss of generality  
 818 we can assume that  $x_n = y_n = 0$ . Let  $x'$  and  $y'$  denote vectors  $x$  and  $y$  without the last coordinate,  
 819 i.e.,  $x' \circ (0) = x$  and  $y' \circ (0) = y$ . Then, from Zero-One Symmetry and Convergence we have

$$f(x, y) = f(\bar{x}, \bar{y}) = f(\bar{x}' \circ (1), \bar{y}' \circ (1)) \leq \frac{n-1}{n}f(\bar{x}', \bar{y}') = \frac{n-1}{n}f(x', y').$$

820 On the other hand,  $(n-1) - |A_{x'} \cup A_{y'}| = (n-1) - |A_x \cup A_y| = N$ , thus from inductive assumption  
 821 we get

$$f(x, y) \leq \frac{n-1}{n}f(x', y') = a \frac{n-1}{n}H(x', y') = aH(x, y).$$

822 It remains to show that  $f(x, y)$  cannot be strictly smaller than  $aH(x, y)$ . To this end, we first prove  
 823 that  $f(y, y' \circ (1)) \leq a/n$ . Since  $y$  and  $y' \circ (1)$  agree on  $n-1$  positions this can be shown from

824 reordering their coordinates and using Convergence or Convergence with Zero-One Symmetry  $n - 1$   
825 times. Then, from Triangle Inequality we obtain

$$f(x, y) + f(y, y' \circ (1)) \geq f(x, y' \circ (1)),$$

826 which is equivalent to

$$f(x, y) \geq f(x, y' \circ (1)) - f(y, y' \circ (1))$$

827 Using inductive assumption on  $f(x, y' \circ (1))$  (as  $n - |A_x \cup A_{y' \circ (1)}| = N$ ) and substituting  $f(y, y' \circ$   
828  $(1)) \leq 1/n$  we get

$$f(x, y) \geq aH(x, y' \circ (1)) - a/n = a(H(x, y) + 1/n) - a/n = aH(x, y),$$

829 which concludes the proof. □

830 Combining Lemma A.6 with Normalization we obtain the thesis. □

### 831 A.2 Proof of Theorem 3.9

832 *Proof.* For each of the axioms we provide a dissimilarity measure  $f$  that satisfies all but that axiom.

833 *Anonymity:*  $f(x, y) = \sum_{i=1}^n |x_i - y_i| \cdot 2^i / (2^{n+1} - 2)$

834 *Scaling:*  $f(x, y) = (|A_x \triangle A_y| + 1) / (2n)$

835 *Independent Symmetry:*  $f(x, y) = \max(|A_x \setminus A_y|, |A_y \setminus A_x|) / n$

836 *Zero-One Symmetry:*  $f(x, y) = J(x, y)$

837 *Convergence:*  $f(x, y) = \max_{i \in [n]} |x_i - y_i|$  (discrete distance)

838 *Triangle Inequality:*  $f(x, y) = H(x, y)^2$

839 *Normalization:*  $f(x, y) = 2 \cdot H(x, y)$

840 □

### 841 A.3 Proof of Theorem 4.2

842 *Proof.* Let us first show that the Jaccard distance indeed satisfies the respective axioms, by considering  
843 them one by one.

844 *Anonymity*

845 Clearly, for every  $x, y \in \{0, 1\}^n$  and permutation  $\pi : [n] \rightarrow [n]$  it holds that  $|A_x \triangle A_y| =$   
846  $|A_{\pi(x)} \triangle A_{\pi(y)}|$  as well as  $|A_x \cup A_y| = |A_{\pi(x)} \cup A_{\pi(y)}|$ . Thus,

$$J(\pi(x), \pi(y)) = J(x, y).$$

847 *Scaling*

848 Observe that for every  $x, y \in \{0, 1\}^n$  and  $k \in \mathbb{N}$  it holds that

$$J(x^k, y^k) = \frac{k \cdot |A_x \triangle A_y|}{k \cdot |A_x \cup A_y|} = \frac{|A_x \triangle A_y|}{|A_x \cup A_y|} = J(x, y).$$

849 *Independent Symmetry*

850 For every  $x, y \in \{0, 1\}^n$  and  $i \in [n]$  it holds that  $|A_x \triangle A_y| = |A_{(x-i, y_i)} \triangle A_{(y-i, x_i)}|$  as  
851 well as  $|A_x \cup A_y| = |A_{(x-i, y_i)} \cup A_{(y-i, x_i)}|$ . Thus,

$$J((x-i, y_i), (y-i, x_i)) = J(x, y).$$

852 *Add Zero*

853 Note that for every  $x, y \in \{0, 1\}^n$  it holds that  $|A_x \triangle A_y| = |A_{x \circ (0)} \triangle A_{y \circ (0)}|$  and  $|A_x \cup$   
854  $A_y| = |A_{x \circ (0)} \cup A_{y \circ (0)}|$ . Hence,

$$J(x \circ (0), y \circ (0)) = J(x, y).$$

### Convergence

Fix arbitrary  $x, y \in \{0, 1\}^n$ . Observe that after concatenating an additional bit to  $x$  and  $y$  with 1s on both sides, the symmetric difference will not change, i.e.,  $|A_{x \circ (1)} \Delta A_{y \circ (1)}| = |A_x \Delta A_y|$ . On the other hand, the union increases by 1, i.e.,  $|A_{x \circ (1)} \cup A_{y \circ (1)}| = |A_x \cup A_y| + 1$ . Thus, we have

$$J(x \circ (1), y \circ (1)) = \frac{|A_x \Delta A_y|}{|A_x \cup A_y| + 1} \leq \frac{n}{n+1} \cdot \frac{|A_x \Delta A_y|}{|A_x \cup A_y|} = \frac{n}{n+1} \cdot J(x, y),$$

where the inequality comes from the fact that  $|A_x \cup A_y| \leq n$ , so  $|A_x \cup A_y| / (|A_x \cup A_y| + 1) \leq n / (n + 1)$ .

### Triangle Inequality<sup>2</sup>

Take arbitrary  $x, y, z \in \{0, 1\}^n$ . Since  $J(x, z) = |A_x \Delta A_z| / |A_x \cup A_z| \leq 1$ , we have

$$J(x, z) \leftarrow \frac{|A_x \Delta A_z| + |A_y \setminus (A_x \cup A_z)|}{|A_x \cup A_z| + |A_y \setminus (A_x \cup A_z)|} = \frac{|A_x \Delta A_z| + |A_y \setminus (A_x \cup A_z)|}{|A_x \cup A_y \cup A_z|}.$$

On the other hand,

$$J(x, y) = \frac{|A_x \Delta A_y|}{|A_x \cup A_y|} \geq \frac{|A_x \Delta A_y|}{|A_x \cup A_y \cup A_z|}$$

and similarly  $J(y, z) \geq |A_y \Delta A_z| / |A_x \cup A_y \cup A_z|$ . Now, observe that  $(A_x \Delta A_y) \cup (A_y \Delta A_z)$  is actually equal to  $(A_x \cup A_y \cup A_z) \setminus (A_x \cap A_y \cap A_z)$ . Thus, it holds that  $(A_x \Delta A_z) \subseteq (A_x \Delta A_y) \cup (A_y \Delta A_z)$  as well as  $(A_y \setminus (A_x \cup A_z)) \subseteq (A_x \Delta A_y) \cup (A_y \Delta A_z)$ . Since  $(A_x \Delta A_z)$  and  $(A_y \setminus (A_x \cup A_z))$  are disjoint, this gives us

$$|A_x \Delta A_z| + |A_y \setminus (A_x \cup A_z)| \leq |(A_x \Delta A_y) \cup (A_y \Delta A_z)| \leq |A_x \Delta A_y| + |A_y \Delta A_z|.$$

Combining all inequalities we get

$$J(x, y) + J(y, z) \geq \frac{|A_x \Delta A_y| + |A_y \Delta A_z|}{|A_x \cup A_y \cup A_z|} \geq \frac{|A_x \Delta A_z| + |A_y \setminus (A_x \cup A_z)|}{|A_x \cup A_y \cup A_z|} \geq J(x, z).$$

### Normalization

Clearly,  $J((0), (1)) = 1$ .

Now, let us focus on the converse statement, i.e., that any dissimilarity measure that satisfies these axioms must necessarily be the Jaccard distance. We will prove that in a series of lemmas that will consider arbitrary dissimilarity measure  $f$  satisfying increasing subset of our axioms. In each lemma, we will prove what form has to have such a function  $f$ . In the last one, Lemma A.10, we show that if  $f$  satisfies all of our axioms except for Normalization, then  $f$  has to be equal to the Jaccard distance multiplied by a nonnegative scalar, i.e., there exists  $a \in \mathbb{R}_{\geq 0}$  such that  $f(x, y) = a \cdot J(x, y)$ , for every  $x, y \in \{0, 1\}$ . Then, Normalization implies the thesis.

From the proof of the characterization of the Hamming distance we already know how do dissimilarity measures that satisfy Anonymity and Independent Symmetry look like. Let us add Add Zero to that.

**Lemma A.7.** *If a dissimilarity measure,  $f$ , satisfies Anonymity, Independent Symmetry, and Add Zero, then there exists a function,  $g : \mathbb{N}^2 \rightarrow \mathbb{R}_{\geq 0}$ , such that for every  $x, y \in \{0, 1\}^n$  it holds that*

$$f(x, y) = g(|A_x \Delta A_y|, |A_x \cup A_y|).$$

*Proof.* Since  $f$  satisfies Anonymity and Independent Symmetry, from Lemma A.1 we know that there exists a function,  $g : \mathbb{N}^3 \rightarrow \mathbb{R}_{\geq 0}$ , such that for every  $x, y \in \{0, 1\}^n$  we have

$$f(x, y) = g(|A_x \cap A_y|, |A_x \Delta A_y|, n - |A_x \cup A_y|).$$

It remains to show that for arbitrary  $x, y \in \{0, 1\}^n$  it holds that

$$g(|A_x \cap A_y|, |A_x \Delta A_y|, n - |A_x \cup A_y|) = g(|A_x \cap A_y|, |A_x \Delta A_y|, 0). \quad (6)$$

By Anonymity, without loss of generality, we can assume that all indices  $i \in [n]$  such that  $x_i = y_i = 0$  are greater than all other indices. Then, let  $n' = |A_x \cup A_y|$  and  $x', y' \in \{0, 1\}^{n'}$  be vectors such that  $x'_i = x_i$  and  $y'_i = y_i$  for every  $i \in [n']$ . By Add Zero used  $n - n'$  times, we obtain that  $f(x, y) = f(x', y')$ . Since  $n' - |A_{x'} \cup A_{y'}| = 0$ , this proves Equation (6).  $\square$

<sup>2</sup>It is a known fact that the Jaccard distance satisfies Triangle Inequality (see e.g., [15, 21]). We provide a proof for completeness.

890 **Lemma A.8.** *If a dissimilarity measure,  $f$ , satisfies Anonymity, Independent Symmetry, Add Zero,*  
 891 *and Scaling then there exists a function,  $g : (\mathbb{Q} \cap [0, 1]) \rightarrow \mathbb{R}_{\geq 0}$ , such that for every  $x, y \in \{0, 1\}^n$  it*  
 892 *holds that*

$$f(x, y) = g(|A_x \triangle A_y| / |A_x \cup A_y|).$$

893 *Proof.* Assume otherwise, i.e., there exist four vectors  $x, y, a, b \in \{0, 1\}^n$  such that  $|A_x \triangle A_y| / |A_x \cup$   
 894  $A_y| = |A_a \triangle A_b| / |A_a \cup A_b|$  and  $f(x, y) \neq f(a, b)$ . Let  $m$  be the least common multiple of  $|A_x \cup A_y|$   
 895 and  $|A_a \cup A_b|$  and let  $p = m / |A_x \cup A_y|$  and  $q = m / |A_a \cup A_b|$ . By Scaling, we know that  
 896  $f(x, y) = f(x^p, y^p)$  and  $f(a, b) = f(a^q, b^q)$ . Thus, to get the contradiction, it remains to show that  
 897  $f(x^p, y^p) = f(a^q, b^q)$ .

898 To this end, observe that

$$\begin{aligned} |A_{x^p} \triangle A_{y^p}| &= p \cdot |A_x \triangle A_y| \\ &= p \cdot |A_x \cup A_y| \cdot \frac{|A_a \triangle A_b|}{|A_a \cup A_b|} \\ &= \frac{p \cdot |A_x \cup A_y|}{q \cdot |A_a \cup A_b|} \cdot q \cdot |A_a \triangle A_b| \\ &= \frac{m}{m} \cdot q \cdot |A_a \triangle A_b| \\ &= |A_{a^q} \triangle A_{b^q}|. \end{aligned}$$

899 Thus, both sum and the symmetric difference of  $A_{x^p}, A_{y^p}$  and  $A_{a^q}, A_{b^q}$  are of equal size. This  
 900 implies that also their intersections are of equal size. Since  $f$  satisfies Anonymity, Independent  
 901 Symmetry, and Add Zero, by Lemma A.7, this means that  $f(x^p, y^p) = f(a^q, b^q)$ . This concludes the  
 902 proof.  $\square$

903 **Lemma A.9.** *If a dissimilarity measure,  $f$ , satisfies Anonymity, Independent Symmetry, Add Zero,*  
 904 *Scaling, and Triangle Inequality, then there exists a subadditive function,  $g : (\mathbb{Q} \cap [0, 1]) \rightarrow \mathbb{R}_{\geq 0}$ ,*  
 905 *such that for every  $x, y \in \{0, 1\}^n$  it holds that*

$$f(x, y) = g(|A_x \triangle A_y| / |A_x \cup A_y|).$$

906 *Proof.* From Lemma A.8 we know that there exists a function,  $g : (\mathbb{Q} \cap [0, 1]) \rightarrow \mathbb{R}_{\geq 0}$ , such  
 907 that for every  $x, y \in \{0, 1\}^n$  it holds that  $f(x, y) = g(|A_x \triangle A_y| / |A_x \cup A_y|)$ . It remains to show  
 908 that  $g$  is subadditive, i.e., for arbitrary  $p, q \in (\mathbb{Q} \cap [0, 1])$  such that  $p + q \leq 1$ , it holds that  
 909  $g(p) + g(q) \geq g(p + q)$ . To this end, let  $r = 1 - p - q$  and let  $k$  be such that  $pk, qk, rk \in \mathbb{N}$ . Then,  
 910 consider the following three vectors

$$\begin{aligned} x &= (1)^{pk} \circ (1)^{rk} \circ (0)^{qk}, \\ y &= (0)^{pk} \circ (1)^{rk} \circ (0)^{qk}, \text{ and} \\ z &= (0)^{pk} \circ (1)^{rk} \circ (1)^{qk}. \end{aligned}$$

911 Then, from Triangle Inequality we get  $f(x, y) + f(y, z) \geq f(x, z)$ , which in terms of  $g$  means  
 912  $g(\frac{kp}{k(p+q+r)}) + g(\frac{kq}{k(p+q+r)}) \geq g(\frac{k(p+q)}{k(p+q+r)})$ . Since  $p + q + r = 1$ , we get that indeed  $g(p) + g(q) \geq$   
 913  $g(p + q)$ , which concludes the proof.  $\square$

914 **Lemma A.10.** *If a dissimilarity measure,  $f$ , satisfies Anonymity, Independent Symmetry, Add Zero,*  
 915 *Scaling, Convergence, and Triangle Inequality then there exists constant  $a \in \mathbb{R}_{\geq 0}$  such that for every*  
 916  *$x, y \in \{0, 1\}^n$  it holds that*

$$f(x, y) = a \cdot J(x, y).$$

917 *Proof.* From Lemma A.9 we know that there exists a subadditive function,  $g : (\mathbb{Q} \cap [0, 1]) \rightarrow \mathbb{R}_{\geq 0}$ ,  
 918 such that for every  $x, y \in \{0, 1\}^n$  it holds that  $f(x, y) = g(|A_x \triangle A_y| / |A_x \cup A_y|) = g(J(x, y))$ . Let  
 919  $a = g(1)$ . We will show that for every  $r \in \mathbb{Q} \cap [0, 1]$  it holds that  $g(r) = ar$ , which will imply the  
 920 thesis.

921 We begin by showing that for every  $r \in \mathbb{Q} \cap [0, 1]$  it holds that

$$g(r/2) = g(r)/2. \tag{7}$$

922 Let  $p, q \in \mathbb{N}$  be such that  $r = p/q$ . Then, by Convergence we get that

$$\begin{aligned} g(p/q) &= f((1)^q, (0)^p \circ (1)^{q-p}) \\ &\geq 2 \cdot f((1)^q \circ (1)^q, (0)^p \circ (1)^{q-p} \circ (1)^q) \\ &= 2 \cdot g(p/(2q)). \end{aligned}$$

923 Hence,  $g(r) \geq 2 \cdot g(r/2)$ . On the other hand,  $g(r) \leq 2 \cdot g(r/2)$  from subadditivity. Thus, indeed  
924 Equation (7) holds.

925 Next, we generalize Equation (7) and prove that for every  $r \in \mathbb{Q} \cap [0, 1]$  and  $q \in \mathbb{N}$  it holds that

$$g(r/q) = g(r)/q. \quad (8)$$

926 Observe that it is enough to prove this equality for prime  $q$ , as for composite  $qs$  we can obtain  
927 the thesis by combining the results for all prime factors of  $q$ . Thus, without loss of generality,  
928 let us assume that  $q$  is prime. Clearly, from subadditivity, we have that  $g(r/q) \geq g(r)/q$ . For a  
929 contradiction assume that  $g(r/q) = g(r)/q + \varepsilon$  for some  $\varepsilon > 0$ . By Little Fermat's Theorem, we  
930 know that there exists  $p \in \mathbb{N}$  such that  $p \cdot q = 2^{q-1} - 1$ . Then, we have that  $1 + p \cdot q = 2^{(q-1)}$ , which  
931 means that  $1 = (1 + p \cdot q)/2^{(q-1)}$ . In turn, this implies that

$$\frac{1}{q} = \frac{1 + p \cdot q}{2^{q-1}q} = \frac{1}{2^{q-1}q} + \frac{p}{2^{q-1}}. \quad (9)$$

932 Thus, we get

$$\begin{aligned} g\left(\frac{r}{q}\right) &= g\left(\frac{r}{2^{k(q-1)}q} + \frac{r \cdot p}{2^{k(q-1)}}\right) && \text{(from Equation (9))} \\ &\leq g\left(\frac{r}{2^{q-1}q}\right) + p \cdot g\left(\frac{r}{2^{q-1}}\right) && \text{(from subadditivity)} \\ &= \frac{1}{2^{q-1}}g\left(\frac{r}{q}\right) + \frac{p}{2^{q-1}}g(r). && \text{(from Equation (7) used } q-1 \text{ times)} \end{aligned}$$

933 Substituting  $g(r/q) = g(r)/q + \varepsilon$ , we get

$$\begin{aligned} g(r)/q + \varepsilon &\leq \frac{g(r)/q + \varepsilon}{2^{q-1}} + \frac{p}{2^{q-1}}g(r) \\ &= g(r)\frac{1 + p \cdot q}{2^{q-1}q} + \varepsilon/2^{q-1} \\ &= g(r)/q + \varepsilon/2^{q-1}. && \text{(from Equation (9))} \end{aligned}$$

934 Thus,  $\varepsilon \leq \varepsilon/2^{q-1}$ , which is a contradiction for  $\varepsilon > 0$ . Therefore, Equation (8) indeed holds, from  
935 which we immediately obtain that

$$\begin{aligned} g(0) &= 0, \text{ and} \\ g(1/q) &= a/q, \text{ for every } q \in \mathbb{N}. \end{aligned} \quad (10)$$

936 Finally, let us take  $r = p/q$  for arbitrary  $p, q \in \mathbb{N}$  such that  $1 \leq p \leq q$ . From subadditivity and  
937 Equation (10) we get that  $g(p/q) \leq p \cdot g(1/q) = ap/q$ . On the other hand, again from subadditivity  
938 and Equation (10), we get that  $g(p/q) \geq g(1) - (q-p)g(1/q) = a - a(q-p)/q = a \cdot p/q$ . Thus,  
939 indeed  $g(r) = ar$ , for every  $r \in \mathbb{Q} \cap [0, 1]$ , which concludes the proof.  $\square$

940 Combining Lemma A.10 with Normalization we obtain the thesis.  $\square$

#### 941 A.4 Proof of Theorem 4.3

942 *Proof.* For each of the axioms we provide a dissimilarity measure  $f$  that satisfies all but that axiom.

943 *Anonymity:*  $f(x, y) = \sum_{i=1}^n |x_i - y_i| \cdot 2^i / (\sum_{i=1}^n \max(x_i, y_i) \cdot 2^i)$

944 *Scaling:*  $f(x, y) = (|A_x \triangle A_y| + 1) / (2|A_x \cup A_y|)$

945 *Independent Symmetry:*  $f(x, y) = \max(|A_x \setminus A_y|, |A_y \setminus A_x|) / |A_x \cup A_y|$



946 *Add Zero:*  $f(x, y) = H(x, y)$   
 947 *Convergence:*  $f(x, y) = \max_{i \in [n]} |x_i - y_i|$  (discrete distance)  
 948 *Triangle Inequality:*  $f(x, y) = J(x, y)^2$   
 949 *Normalization:*  $f(x, y) = 2 \cdot J(x, y)$

950

□

## 951 A.5 Proof of Proposition 6.1

952 *Proof.* Consider three arbitrary candidates  $x, y, z$  and without loss of generality assume that their  
 953 positions are such that  $p_x < p_y < p_z$ . With a slight abuse of notation by  $x, y, z \in \{0, 1\}^n$  we will  
 954 also denote the approval vectors for candidates  $x, y, z$ , respectively. Let us use the following notation:

$$\begin{aligned} n_x &= |A_x \setminus (A_y \cup A_z)|, \\ n_y &= |A_y \setminus (A_x \cup A_z)|, \\ n_z &= |A_z \setminus (A_x \cup A_y)|, \\ n_{xy} &= |(A_x \cap A_y) \setminus A_z|, \\ n_{yz} &= |(A_y \cap A_z) \setminus A_x|, \\ n_{xyz} &= |A_x \cap A_y \cap A_z|. \end{aligned}$$

955 Note that all of the above sets are pairwise disjoint. Since  $y$  is between  $x$  and  $z$  and we assumed  
 956 equal radii, then  $(A_x \cap A_z) \setminus A_y$  has to be empty (the intersection of the  $x$ 's and  $z$ 's interval, if it  
 957 exists, must be entirely contained in the  $y$ 's interval).

958 Now, we need to show that  $J(x, y) \leq J(x, z)$ , i.e.,

$$\frac{|A_x \triangle A_y|}{|A_x \cap A_y|} \leq \frac{|A_x \triangle A_z|}{|A_x \cap A_z|}.$$

959 This is equivalent to

$$\frac{n_x + n_y + n_{yz}}{n_x + n_y + n_{xy} + n_{yz} + n_{xyz}} \leq \frac{n_x + n_z + n_{xy} + n_{yz}}{n_x + n_z + n_{xy} + n_{yz} + n_{xyz}}.$$

960 After simplifying, we get

$$n_y n_{xyz} \leq n_{xy} (n_x + n_z + n_{xy} + n_{yz} + n_{xyz}) + n_z n_{xyz}.$$

961 However, since the radii of all intervals are the same, it must hold that either the  $y$ 's interval is  
 962 completely contained in the sum of  $x$ 's and  $z$ 's intervals, and then  $n_y = 0$ , or  $x$ 's and  $z$ 's intervals do  
 963 not intersect, and then  $n_{xyz} = 0$ . Thus, the left hand side of the last inequality is always equal to 0  
 964 and since the right hand is always nonnegative, this concludes the proof. □

## 965 B Axiomatic Characterization of the Discrete Distance

966 The axioms on which the Hamming and Jaccard distances differ are Zero-One Symmetry and Add  
 967 Zero. A reader may wonder if it is possible to satisfy both of this axioms at the same time. In this  
 968 section, we show that these two axioms together with some axioms that are shared by Hamming and  
 969 Jaccard uniquely characterize the discrete distance, which for every pair of vectors  $x, y \in \{0, 1\}^n$ , is  
 970 defined as

$$D(x, y) = \max_{i \in [n]} |x_i - y_i| = \begin{cases} 0, & \text{if } x = y, \\ 1, & \text{otherwise.} \end{cases}$$

971 To this end, we first introduce one more axiom, which is a standard distance metric axiom and is  
 972 satisfied by both Hamming and Jaccard.

973 **Definition B.1** (Identity). A dissimilarity measure,  $f$ , satisfies *Identity* if for every vectors  $x, y \in$   
 974  $\{0, 1\}^n$  it holds that

$$f(x, y) = 0 \iff x = y.$$

975 Now, let us state the main result of this appendix.

976 **Theorem B.2.** *A dissimilarity measure,  $f$ , satisfies Anonymity, Independent Symmetry, Add Zero,*  
 977 *Zero-One Symmetry, Scaling, Identity, and Normalization if and only if  $f$  is the discrete distance.*

978 *Proof.* Let us first show that the discrete distance indeed satisfies the respective axioms, by consider-  
 979 ing them one by one.

980 *Anonymity*

981 Clearly, for every  $x, y \in \{0, 1\}^n$  and permutation  $\pi : [n] \rightarrow [n]$ , it holds that  
 982  $x = y \Leftrightarrow \pi(x) = \pi(y)$ . Thus,

$$D(\pi(x), \pi(y)) = D(x, y).$$

983 *Scaling*

984 Observe that for every  $x, y \in \{0, 1\}^n$  and  $k \in \mathbb{N}$ , it holds that  $x = y \Leftrightarrow x^k = y^k$ .  
 985 Hence,

$$D(x^k, y^k) = D(x, y).$$

986 *Independent Symmetry*

987 For every  $x, y \in \{0, 1\}^n$  and  $i \in [n]$ , it holds that  $x = y \Leftrightarrow (x_{-i}, y_i) = (y_{-i}, x_i)$ .  
 988 Thus,

$$D((x_{-i}, y_i), (y_{-i}, x_i)) = D(x, y).$$

989 *Zero-One Symmetry*

990 Note that for every  $x, y \in \{0, 1\}^n$ , it holds that  $x = y \Leftrightarrow \bar{x} = \bar{y}$ . Hence,

$$D(\bar{x}, \bar{y}) = D(x, y).$$

991 *Add Zero*

992 Note that for every  $x, y \in \{0, 1\}^n$ , it holds that  $x = y \Leftrightarrow x \circ (0), y \circ (0)$ . Thus,

$$D(x \circ (0), y \circ (0)) = D(x, y).$$

993 *Identity*

994 We get the Identity directly from the definition of the discrete distance.

995 *Normalization*

996 Clearly,  $D((0), (1)) = 1$ .

997 Now, let us focus on the converse statement, i.e., that any dissimilarity measure that satisfies these  
 998 axioms must necessarily be the discrete distance.

999 From the proof of the Jaccard distance we already know how does the class of dissimilarity measures  
 1000 satisfying Anonymity, Independent Symmetry, and Add Zero behaves. Now, let us add to it Zero-One  
 1001 Symmetry.

1002 **Lemma B.3.** *If a dissimilarity measure,  $f$ , satisfies Anonymity, Independent Symmetry, Add Zero,*  
 1003 *and Zero-One Symmetry then there exists a function,  $g : \mathbb{N} \rightarrow \mathbb{R}_{\geq 0}$ , such that for every  $x, y \in \{0, 1\}^n$*   
 1004 *it holds that*

$$f(x, y) = g(|A_x \triangle A_y|).$$

1005 *Proof.* From Lemma A.7 we know that there exists a function,  $g : \mathbb{N}^2 \rightarrow \mathbb{R}_{\geq 0}$ , such that for every  
 1006  $x, y \in \{0, 1\}^n$  it holds that  $f(x, y) = g(|A_x \triangle A_y|, |A_x \cup A_y|)$ . Hence, it is enough to show that  
 1007  $g(|A_x \triangle A_y|, |A_x \cup A_y|) = g(|A_x \triangle A_y|, |A_x \triangle A_y|)$  for every pair  $x, y \in \{0, 1\}^n$ .

To this end, fix arbitrary  $x, y \in \{0, 1\}^n$ . Let  $x', y' \in \{0, 1\}^{n'}$  be vectors obtained from  $x, y$   
 with all coordinates on which  $x$  and  $y$  have both 0s removed. Since  $|A_{x'} \triangle A_{y'}| = |A_x \triangle A_y|$  and  
 $|A_{x'} \cup A_{y'}| = |A_x \cup A_y|$ , we know that  $g(|A_x \triangle A_y|, |A_x \cup A_y|) = f(x', y')$ . Then, by Zero-One  
 Symmetry we obtain  $g(|A_x \triangle A_y|, |A_x \cup A_y|) = f(x', y') = f(\bar{x}', \bar{y}') = g(|A_{\bar{x}'} \triangle A_{\bar{y}'}|, |A_{\bar{x}'} \cup A_{\bar{y}'}|)$ .  
 However, since there is no index  $i \in [n']$  such that  $x'_i = y'_i = 0$ , there is also none for which

$\bar{x}'_i = \bar{y}'_i = 1$ , i.e.,  $A_{\bar{x}'} \cap A_{\bar{y}'} = \emptyset$ . This means that  $A_{\bar{x}'} \cup A_{\bar{y}'} = A_{\bar{x}'} \triangle A_{\bar{y}'}$ . On the other hand,  $A_{\bar{x}'} \cup A_{\bar{y}'} = A_x \cup A_y$ . Thus, indeed

$$g(|A_x \triangle A_y|, |A_x \cup A_y|) = f(x', y') = f(\bar{x}', \bar{y}') = g(|A_x \triangle A_y|, |A_x \cup A_y|)$$

1008

□

1009 Next, we consider dissimilarity measures satisfying Scaling as well.

1010 **Lemma B.4.** *If a dissimilarity measure,  $f$ , satisfies Anonymity, Scaling, Independent Symmetry, Add*  
 1011 *Zero, and Zero-One Symmetry, then there exist constants  $a, b \in \mathbb{R}_{\geq 0}$ , such that*

$$f(x, y) = \begin{cases} a & \text{if } x = y, \\ b & \text{otherwise.} \end{cases}$$

1012 *Proof.* From Lemma B.3 we know that there exists a function,  $g : \mathbb{N} \rightarrow \mathbb{R}_{\geq 0}$ , such that for every  
 1013  $x, y \in \{0, 1\}^n$  it holds that  $f(x, y) = g(|A_x \triangle A_y|)$ . Let us denote  $a = g(0)$  and  $b = g(1)$ . It  
 1014 remains to show that  $g(k) = b$  also for every  $k \in \{2, 3, \dots\}$ . From Scaling, we know that  
 1015  $f((1)^k, (0)^k) = f((1), (0))$ . Thus, indeed

$$g(k) = f((1)^k, (0)^k) = f((1), (0)) = g(1) = b.$$

1016

□

1017 Finally, as from Lemma B.4 we know that

$$f(x, y) = \begin{cases} a & \text{if } x = y, \\ b & \text{otherwise,} \end{cases}$$

1018 for every  $x, y \in \{0, 1\}^n$ , arriving at the thesis is straightforward. Indeed, we know that  $a = 0$  from  
 1019 Identity and  $b = 1$  from Normalization. □

1020 Once again, we can show that the axioms characterizing the discrete distance are independent.

1021 **Theorem B.5.** *For every axiom in the set Anonymity, Independent Symmetry, Add Zero, Zero-One*  
 1022 *Symmetry, Scaling, Identity, and Normalization there is a dissimilarity measure that satisfies all other*  
 1023 *axioms in this set except for this one.*

1024 *Proof.* For each of the axioms we provide a dissimilarity measure  $f$  that satisfies all but that axiom.

1025 *Anonymity:*  $f(x, y) = \max_{i \in [n]} \frac{|x_i - y_i|}{2^{i-1}}$

1026 *Scaling:*  $f(x, y) = \sum_{i \in [n]} |x_i - y_i| = n \cdot H(x, y)$

1027 *Independent Symmetry:*  $f(x, y) = \begin{cases} 0, & \text{if } x = y, \\ \max(|A_x \setminus A_y|, |A_y \setminus A_x|) / |A_x \triangle A_y|, & \text{otherwise.} \end{cases}$

1028 *Add Zero:*  $f(x, y) = H(x, y)$

1029 *Zero-One Symmetry:*  $f(x, y) = J(x, y)$

1030 *Identity:*  $f(x, y) = (D(x, y) + 1)/2$

1031 *Normalization:*  $f(x, y) = 2 \cdot D(x, y)$

1032

□

Table 5: Parameters of real-life participatory budgeting instances.

| Metric                      | Warsaw  |         | Kraków  |         | Łódź    |         |
|-----------------------------|---------|---------|---------|---------|---------|---------|
|                             | 2023    | 2024    | 2023    | 2024    | 2023    | 2024    |
| Number of instances         | 18      | 18      | 18      | 18      | 36      | 36      |
| Avg. num. of voters         | 4562.61 | 4128.00 | 3605.94 | 3616.72 | 2549.86 | 2470.94 |
| Avg. num. of projects       | 59.17   | 60.94   | 31.06   | 31.72   | 18.33   | 19.03   |
| Avg. num. of categories     | 7.94    | 8.0     | 5.67    | 5.72    | 3.5     | 3.61    |
| Avg. num. of proj. per cat. | 19.24   | 19.96   | 4.47    | 4.33    | 3.76    | 3.83    |

Table 6: Average Pearson correlation between our six measures and the Euclidean distance.

| Metric                  | Warsaw       |              |              |              |              |              | Wieliczka    |
|-------------------------|--------------|--------------|--------------|--------------|--------------|--------------|--------------|
|                         | 2019         | 2020         | 2021         | 2022         | 2023         | 2024         | 2023         |
| Number of districts     | 18           | 18           | 18           | 18           | 18           | 18           | 1            |
| $H_0$ geometric Hamming | 0.123        | 0.077        | 0.067        | 0.093        | 0.058        | 0.024        | 0.228        |
| $H_1$ Hamming           | 0.101        | 0.049        | 0.057        | 0.074        | 0.041        | 0.012        | 0.186        |
| $H_2$ quadratic Hamming | 0.081        | 0.034        | 0.045        | 0.056        | 0.031        | 0.005        | 0.154        |
| $J_0$ geometric Jaccard | <b>0.283</b> | <b>0.219</b> | <b>0.226</b> | <b>0.175</b> | <b>0.236</b> | <b>0.260</b> | <b>0.441</b> |
| $J_1$ Jaccard           | 0.268        | 0.208        | 0.210        | 0.162        | 0.222        | 0.244        | 0.369        |
| $J_2$ quadratic Jaccard | 0.262        | 0.205        | 0.205        | 0.156        | 0.219        | 0.238        | 0.387        |
| $J_0 > J_1$             | 0.94         | 0.89         | 0.94         | 0.83         | 0.89         | 0.89         | 1.0          |

1034 **References**

- 1035 [1] M. Ackerman and S. Ben-David. Measures of clustering quality: A working set of axioms for  
1036 clustering. *Advances in Neural Information Processing Systems*, 21, 2008.
- 1037 [2] M. Ackerman and S. Ben-David. Discerning linkage-based algorithms among hierarchical  
1038 clustering methods. In *IJCAI*, pages 1140–1145, 2011.
- 1039 [3] M. Ackerman, S. Ben-David, S. Brânzei, and D. Loker. Weighted clustering: Towards solving  
1040 the user’s dilemma. *Pattern Recognition*, 120:108152, 2021.
- 1041 [4] M. Ackerman, S. Ben-David, and D. Loker. Characterization of linkage-based clustering. In  
1042 *COLT*, volume 2010, pages 270–281, 2010.
- 1043 [5] S. Bag, S. K. Kumar, and M. K. Tiwari. An efficient recommendation generation using relevant  
1044 jaccard similarity. *Information Sciences*, 483:53–64, 2019.
- 1045 [6] N. Boehmer, P. Faliszewski, L. Janeczko, A. Kaczmarczyk, G. Lisowski, G. Pierczynski,  
1046 S. Rey, D. Stolicki, S. Szufa, and T. Was. Guide to numerical experiments on elections in  
1047 computational social choice. In *Proceedings of the 33rd International Joint Conference on*  
1048 *Artificial Intelligence (IJCAI)*, pages 7962–7970, 2024.
- 1049 [7] F. Brandt, V. Conitzer, U. Endriss, J. Lang, and A. Procaccia, editors. *Handbook of Computa-*  
1050 *tional Social Choice*. Cambridge University Press, 2016.
- 1051 [8] G. E. Carlsson, F. Mémoli, et al. Characterization, stability and convergence of hierarchical  
1052 clustering methods. *J. Mach. Learn. Res.*, 11(Apr):1425–1470, 2010.
- 1053 [9] S.-H. Cha. Comprehensive survey on distance/similarity measures between probability density  
1054 functions. *International Journal of Mathematical models and Methods in Applied Sciences*,  
1055 1(4):300–307, 2007.

- [10] V. Cohen-Addad, V. Kanade, and F. Mallmann-Trenn. Clustering redemption—beyond the impossibility of kleinberg’s axioms. *Advances in Neural Information Processing Systems*, 31, 2018.
- [11] C. Dwork, M. Hardt, T. Pitassi, O. Reingold, and R. Zemel. Fairness through awareness. In *Proceedings of the 3rd innovations in theoretical computer science conference*, pages 214–226, 2012.
- [12] D. Erhan, C. Szegedy, A. Toshev, and D. Anguelov. Scalable object detection using deep neural networks. In *Proceedings of the IEEE conference on computer vision and pattern recognition*, pages 2147–2154, 2014.
- [13] P. Faliszewski, J. Flis, D. Peters, G. Pierczyński, P. Skowron, D. Stolicki, S. Szufa, and N. Talmon. Participatory budgeting: Data, tools and analysis. In *Proceedings of the 32nd International Joint Conference on Artificial Intelligence (IJCAI)*, pages 2667–2674, 8 2023.
- [14] G. Gerasimou. Characterization of the jaccard dissimilarity metric and a generalization. *Discrete Applied Mathematics*, 355:57–61, 2024.
- [15] G Gilbert. Distance between sets. *Nature*, 239(5368):174–174, 1972.
- [16] Q. Huang, P. Luo, and A. K. H. Tung. A new sparse data clustering method based on frequent items. *Proceedings of the ACM on Management of Data*, 1(1):1–28, 2023.
- [17] L. Kaufman and P. J. Rousseeuw. *Finding groups in data: an introduction to cluster analysis*. John Wiley & Sons, 2009.
- [18] J. G. Kemeny. Mathematics without numbers. *Daedalus*, 88(4):577–591, 1959.
- [19] J. Kleinberg. An impossibility theorem for clustering. *Advances in neural information processing systems*, 15, 2002.
- [20] M. A. Kłopotek and R. A. Kłopotek. In-the-limit clustering axioms. In *International Conference on Artificial Intelligence and Soft Computing*, pages 199–209. Springer, 2020.
- [21] Sven Kosub. A note on the triangle inequality for the jaccard distance. *Pattern Recognition Letters*, 120:36–38, 2019.
- [22] M. Lackner and P. Skowron. *Multi-winner voting with approval preferences*. Springer Nature, 2023.
- [23] H. Moulin. Implementing efficient, anonymous and neutral social choice functions. *Journal of Mathematical Economics*, 7(3):249–269, 1980.
- [24] S. Niwattanakul, J. Singthongchai, E. Naenudorn, and S. Wanapu. Using of jaccard coefficient for keywords similarity. In *Proceedings of the International MultiConference of Engineers and Computer Scientists*, volume 1, pages 380–384, 2013.
- [25] D. Peters, G. Pierczyński, and P. Skowron. Proportional participatory budgeting with additive utilities. *Advances in Neural Information Processing Systems*, 34:12726–12737, 2021.
- [26] S. Rey, F. Schmidt, and J. Maly. The (computational) social choice take on indivisible participatory budgeting. *arXiv preprint arXiv:2303.00621*, 2023.
- [27] H. Rezatofighi, N. Tsoi, J. Gwak, A. Sadeghian, I. Reid, and S. Savarese. Generalized intersection over union: A metric and a loss for bounding box regression. In *Proceedings of the IEEE/CVF conference on computer vision and pattern recognition*, pages 658–666, 2019.
- [28] L. S. Shapley. A value for n-person games. *Contributions to the Theory of Games*, 2(28):307, 1953.
- [29] A. N. Tarekegn, M. Giacobini, and K. Michalak. A review of methods for imbalanced multi-label classification. *Pattern Recognition*, 118:107965, 2021.

- 1100 [30] G. Tsoumakas and I. Katakis. Multi-label classification: An overview. *Data Warehousing and*  
1101 *Mining: Concepts, Methodologies, Tools, and Applications*, pages 64–74, 2008.
- 1102 [31] R. B. Zadeh and S. Ben-David. A uniqueness theorem for clustering. In *Proceedings of the*  
1103 *Twenty-Fifth Conference on Uncertainty in Artificial Intelligence*, pages 639–646, 2009.
- 1104 [32] Y.-F. Zhang, W. Ren, Z. Zhang, Z. Jia, L. Wang, and T. Tan. Focal and efficient iou loss for  
1105 accurate bounding box regression. *Neurocomputing*, 506:146–157, 2022.
